# Supplementary material
Source: PubMed Central journal article supplement (PMC6377034)
Supplement: gbw147_suppl_online_supplement_appendix.pdf [file gbw147_suppl_online_supplement_appendix.pdf]

## **Research Design, Methods, and Supplementary Analyses**

### *Health and Retirement Study (HRS)*

Panel data from the 2004-2012 waves of the (HRS) were used (Health and Retirement Study, 2014). The HRS is sponsored by the National Institute on Aging and conducted by the University of Michigan. Multistage stratified panel data on individuals over 50 years of age are collected, with oversamples of Black adults, Hispanic adults, and Floridians. By 2004, the HRS was comprised of five cohorts (e.g., War Babies Cohort, Early Baby Boomers Cohort). Core interviews take place every two years via in-person interviews, telephone calls, self-administered mail-back questionnaires, and Internet surveys. The core survey includes data on health, health services, economic status, and family structure. The HRS also collects data on physical measures, genetics, and psychosocial factors. Beginning in 1994, response rates for all waves have been at least 85%.

### *Childhood Misfortune Variables*

The five domains of misfortune were composed of twenty-seven dichotomous indicators. Infectious disease included measles, mumps, and chicken pox (3 indicators). Chronic disease was comprised of 11 indicators: asthma, diabetes, respiratory disorder, allergies, heart trouble, ear problems, seizures, migraines, stomach problems, high blood pressure, and self-rated health. Childhood impairment included childhood disability, head injury, speech impairment, vision impairment, and learning problems (5 indicators). SES was also built with 5 indicators of paternal education, maternal education, whether or not the child's family ever moved due to finances before 16, paternal occupation, and perception of family SES before 16. Finally, risky parental behavior included whether parent/guardian smoked, parent substance abuse, and parent physical abuse (3 indicators).

### *Adult Covariates*

Adult SES was represented by wealth (cube root transformation of sum of wealth less total debt) and educational attainment (years of schooling). Adult psychosocial factors included marital status (1, married)

## Childhood Misfortune and Handgrip Strength Among Black, White, and Hispanic Americans

and depressive symptoms (Center for Epidemiologic Studies Depression Scale). Physical activity (1, exercise at least once a week), smoking status (never, former, current smoker), body mass index (BMI; kg/m<sup>2</sup>), and a sum of seven comorbid chronic conditions were included to adjust for adult health and lifestyle. We also examined intermediate variables of occupation (manual, service, or professional work) and alcohol use (drinks per week), but they were removed for parsimony after being non-significant in early analyses. Correlations between covariates were modest, the largest being between variables of education and wealth ( $r=0.36$ ) and marital status and wealth ( $r=0.30$ ).

### *Supplementary Analyses*

Additional analyses were completed. First, corresponding male and female coefficients were tested using adjusted Wald tests for each model and time period using Holm's adjustment for multiple comparisons. These tests determine whether the associations of independent variables and HGS are significantly different between men and women ( $H_0: \beta_{\text{women}} = \beta_{\text{men}}$ ). Significant gender differences are indicated by italicized coefficients in Tables S3 and S4. Coefficients differed by gender for Black Americans at T1 (Models 1 and 2) and for Hispanic Americans at T2 (Models 1 and 2). Over both time periods, the linear effect of age differed by gender. These effects were all negative and had greater magnitude in men than women.

We also estimated models using each domain of misfortune to independently predict HGS with age, age<sup>2</sup>, race/ethnicity, and immigration status. The findings confirmed the results presented herein.

Finally, given attrition over the study period, selection bias models were estimated using unique predictors of selective survival (Heckman, 1979). We estimated a probit model predicting survival until the 2012 interview using variables from 2004 and 2006 that are not in our substantive models (change in self-rated health, change in activities of daily living, onset of a memory related disease in the previous two years, change in the number of health conditions, hospital stay in the last two years, receiving home health care in the last two years, subjective probability of living to an age of 80 to 100, medical expenses, and difficulties with activities of daily living and instrumental activities of daily living). Variables known to predict survival were also included (age, race and ethnicity, BMI, smoking, wealth, and depression). We then used the results from

## Childhood Misfortune and Handgrip Strength Among Black, White, and Hispanic Americans

the probit model to create a variable to express mortality risk ( $\lambda$ ) based on the inverse Mills ratio. When added to T2, Model 3 in Table 2, the mortality  $\lambda$  was nonsignificant, indicating parameter estimates were not biased by nonrandom mortality.

## Childhood Misfortune and Handgrip Strength Among Black, White, and Hispanic Americans

**Table S1.** Descriptive Statistics for Men from the Health and Retirement Study (2004-2012)

| Variable                              | Range          | Non-Hispanic White<br>(n=3,713) |              | Non-Hispanic Black<br>(n=438) |      | Hispanic<br>(n=308) |      |
|---------------------------------------|----------------|---------------------------------|--------------|-------------------------------|------|---------------------|------|
|                                       |                | Mean                            | SD           | Mean                          | SD   | Mean                | SD   |
| <i>Dependent Variables</i>            |                |                                 |              |                               |      |                     |      |
| Time 1 HGS (kg)                       | 0.50 – 74.75   | <i>37.71<sup>a</sup></i>        | 9.19         | <i>37.25</i>                  | 9.67 | <i>34.92</i>        | 8.63 |
| Time 2 HGS (kg) <sup>b</sup>          | 6.5 – 70.25    | <i>35.41</i>                    | 9.13         | <i>35.81</i>                  | 8.54 | <i>32.55</i>        | 8.35 |
| <i>Demographics</i>                   |                |                                 |              |                               |      |                     |      |
| Age (Time 1)                          | 52 – 97        | <i>69.14</i>                    | 9.46         | <i>66.76</i>                  | 8.75 | <i>65.85</i>        | 8.52 |
| Age (Time 2) <sup>c</sup>             | 56 – 99        | <i>72.18</i>                    | 8.95         | <i>69.79</i>                  | 8.24 | <i>69.71</i>        | 8.19 |
| Immigrant                             | 0,1            | <i>0.05</i>                     | <sup>d</sup> | <i>0.07</i>                   |      | <i>0.54</i>         |      |
| <i>Childhood Misfortune</i>           |                |                                 |              |                               |      |                     |      |
| Infectious Disease (= 0) <sup>e</sup> | 0,1            | <i>0.07</i>                     |              | <i>0.14</i>                   |      | <i>0.28</i>         |      |
| Infectious Disease (=1)               | 0,1            | <i>0.13</i>                     |              | <i>0.16</i>                   |      | <i>0.23</i>         |      |
| Infectious Disease (=2+)              | 0,1            | <i>0.80</i>                     |              | <i>0.70</i>                   |      | <i>0.49</i>         |      |
| Chronic Disease (=0) <sup>e</sup>     | 0,1            | <i>0.70</i>                     |              | <i>0.74</i>                   |      | <i>0.69</i>         |      |
| Chronic Disease (=1)                  | 0,1            | <i>0.21</i>                     |              | <i>0.17</i>                   |      | <i>0.24</i>         |      |
| Chronic Disease (=2+)                 | 0,1            | <i>0.09</i>                     |              | <i>0.09</i>                   |      | <i>0.07</i>         |      |
| Impairment (=0) <sup>e</sup>          | 0,1            | <i>0.77</i>                     |              | <i>0.81</i>                   |      | <i>0.87</i>         |      |
| Impairment (=1)                       | 0,1            | <i>0.19</i>                     |              | <i>0.16</i>                   |      | <i>0.11</i>         |      |
| Impairment (=2+)                      | 0,1            | <i>0.04</i>                     |              | <i>0.03</i>                   |      | <i>0.02</i>         |      |
| SES (=0) <sup>e</sup>                 | 0,1            | <i>0.24</i>                     |              | <i>0.14</i>                   |      | <i>0.11</i>         |      |
| SES (=1)                              | 0,1            | <i>0.21</i>                     |              | <i>0.18</i>                   |      | <i>0.13</i>         |      |
| SES (=2+)                             | 0,1            | <i>0.55</i>                     |              | <i>0.68</i>                   |      | <i>0.76</i>         |      |
| Parental Behavior (=0) <sup>e</sup>   | 0,1            | <i>0.27</i>                     |              | <i>0.38</i>                   |      | <i>0.32</i>         |      |
| Parental Behavior (=1)                | 0,1            | <i>0.59</i>                     |              | <i>0.51</i>                   |      | <i>0.57</i>         |      |
| Parental Behavior (=2+)               | 0,1            | <i>0.14</i>                     |              | <i>0.11</i>                   |      | <i>0.11</i>         |      |
| <i>Adult Characteristics</i>          |                |                                 |              |                               |      |                     |      |
| <i>Socioeconomic Status</i>           |                |                                 |              |                               |      |                     |      |
| Education (years)                     | 0 – 17         | <i>13.54</i>                    | 2.70         | <i>12.15</i>                  | 3.00 | <i>10.12</i>        | 4.31 |
| Wealth                                | -12.60 – 31.58 | <i>6.87</i>                     | 3.48         | <i>4.00</i>                   | 3.23 | <i>4.21</i>         | 3.06 |
| <i>Psychosocial Factors</i>           |                |                                 |              |                               |      |                     |      |
| Depressive Symptoms                   | 0 – 8          | <i>0.93</i>                     | 1.55         | <i>1.42</i>                   | 1.85 | <i>1.39</i>         | 1.85 |
| Married                               | 0,1            | <i>0.84</i>                     |              | <i>0.68</i>                   |      | <i>0.82</i>         |      |
| <i>Health Factors</i>                 |                |                                 |              |                               |      |                     |      |
| BMI                                   | 16.4 – 57.4    | <i>27.80</i>                    | 4.63         | <i>28.45</i>                  | 5.12 | <i>28.50</i>        | 4.70 |
| Never Smoker <sup>e</sup>             | 0,1            | <i>0.33</i>                     |              | <i>0.31</i>                   |      | <i>0.30</i>         |      |
| Former Smoker                         | 0,1            | <i>0.54</i>                     |              | <i>0.46</i>                   |      | <i>0.53</i>         |      |
| Current Smoker                        | 0,1            | <i>0.13</i>                     |              | <i>0.23</i>                   |      | <i>0.17</i>         |      |
| Physical Activity                     | 0,1            | <i>0.37</i>                     |              | <i>0.26</i>                   |      | <i>0.32</i>         |      |
| Chronic Conditions                    | 0 – 7          | <i>1.66</i>                     | 1.29         | <i>1.68</i>                   | 1.26 | <i>1.30</i>         | 1.13 |

Notes: SD=standard deviation.

<sup>a</sup> Italicized coefficients indicate significant differences in means or proportions at the 0.05 level.

<sup>b</sup> N of cases = 2,801; 311; and 210 at Time 2 measurements due to attrition

<sup>c</sup> Centered around mean age of the sample (68.67 and 71.57 years at Time 1 and Time 2, respectively).

<sup>d</sup> SD of dichotomous variables omitted.

<sup>e</sup> Reference group.

Childhood Misfortune and Handgrip Strength Among Black, White, and Hispanic Americans

**Table S2.** Descriptive Statistics for Women from the Health and Retirement Study (2004-2012)

| Variable                              | Range         | Non-Hispanic White<br>(n=5,046) |              | Non-Hispanic Black<br>(n=855) |      | Hispanic<br>(n=502) |      |
|---------------------------------------|---------------|---------------------------------|--------------|-------------------------------|------|---------------------|------|
|                                       |               | Mean                            | SD           | Mean                          | SD   | Mean                | SD   |
| <i>Dependent Variables</i>            |               |                                 |              |                               |      |                     |      |
| Time 1 HGS (kg)                       | 0.38 – 45.38  | 22.13 <sup>a</sup>              | 5.82         | 24.09                         | 6.27 | 20.78               | 5.55 |
| Time 2 HGS (kg) <sup>b</sup>          | 0.5 – 44.13   | 21.20                           | 5.69         | 23.30                         | 5.85 | 19.41               | 5.67 |
| <i>Demographics</i>                   |               |                                 |              |                               |      |                     |      |
| Age (Time 1)                          | 52 – 100      | 69.31                           | 9.69         | 66.91                         | 9.02 | 66.55               | 9.00 |
| Age (Time 2) <sup>c</sup>             | 56 – 100      | 72.13                           | 8.87         | 69.90                         | 8.20 | 69.90               | 8.57 |
| Immigrant                             | 0,1           | 0.05                            | <sup>d</sup> | 0.05                          |      | 0.53                |      |
| <i>Childhood Misfortune</i>           |               |                                 |              |                               |      |                     |      |
| Infectious Disease (= 0) <sup>e</sup> | 0,1           | 0.05                            |              | 0.09                          |      | 0.17                |      |
| Infectious Disease (=1)               | 0,1           | 0.12                            |              | 0.18                          |      | 0.25                |      |
| Infectious Disease (=2+)              | 0,1           | 0.83                            |              | 0.73                          |      | 0.58                |      |
| Chronic Disease (=0) <sup>e</sup>     | 0,1           | 0.65                            |              | 0.72                          |      | 0.72                |      |
| Chronic Disease (=1)                  | 0,1           | 0.22                            |              | 0.16                          |      | 0.17                |      |
| Chronic Disease (=2+)                 | 0,1           | 0.13                            |              | 0.12                          |      | 0.11                |      |
| Impairment (=0) <sup>e</sup>          | 0,1           | 0.83                            |              | 0.85                          |      | 0.90                |      |
| Impairment (=1)                       | 0,1           | 0.15                            |              | 0.13                          |      | 0.09                |      |
| Impairment (=2+)                      | 0,1           | 0.02                            |              | 0.02                          |      | 0.01                |      |
| SES (=0) <sup>e</sup>                 | 0,1           | 0.21                            |              | 0.14                          |      | 0.09                |      |
| SES (=1)                              | 0,1           | 0.20                            |              | 0.21                          |      | 0.15                |      |
| SES (=2+)                             | 0,1           | 0.59                            |              | 0.65                          |      | 0.76                |      |
| Parental Behavior (=0) <sup>e</sup>   | 0,1           | 0.29                            |              | 0.45                          |      | 0.40                |      |
| Parental Behavior (=1)                | 0,1           | 0.55                            |              | 0.47                          |      | 0.51                |      |
| Parental Behavior (=2+)               | 0,1           | 0.16                            |              | 0.08                          |      | 0.09                |      |
| <i>Adult Characteristics</i>          |               |                                 |              |                               |      |                     |      |
| <i>Socioeconomic Status</i>           |               |                                 |              |                               |      |                     |      |
| Education (years)                     | 0 – 17        | 13.04                           | 2.37         | 12.28                         | 2.70 | 9.05                | 4.38 |
| Wealth                                | -8.20 – 31.57 | 6.40                            | 3.41         | 3.27                          | 2.68 | 3.69                | 2.89 |
| <i>Psychosocial Factors</i>           |               |                                 |              |                               |      |                     |      |
| Depressive Symptoms                   | 0-8           | 1.32                            | 1.85         | 1.79                          | 2.12 | 2.31                | 2.52 |
| Married                               | 0,1           | 0.64                            |              | 0.40                          |      | 0.60                |      |
| <i>Health Factors</i>                 |               |                                 |              |                               |      |                     |      |
| BMI                                   | 9.6 – 61.3    | 27.05                           | 5.74         | 30.47                         | 6.66 | 28.90               | 5.93 |
| Never Smoker <sup>e</sup>             | 0,1           | 0.51                            |              | 0.51                          |      | 0.60                |      |
| Former Smoker                         | 0,1           | 0.36                            |              | 0.33                          |      | 0.29                |      |
| Current Smoker                        | 0,1           | 0.13                            |              | 0.16                          |      | 0.11                |      |
| Physical Activity                     | 0,1           | 0.29                            |              | 0.18                          |      | 0.20                |      |
| Chronic Conditions                    | 0 – 7         | 1.62                            | 1.19         | 1.92                          | 1.21 | 1.53                | 1.18 |

Notes: SD=standard deviation.

<sup>a</sup> Italicized coefficients indicate significant differences in means or proportions at the 0.05 level.

<sup>b</sup> N of cases = 3,634; 595; and 343 at Time 2 measurements due to attrition

<sup>c</sup> Centered around mean age of the sample (68.77 and 71.67 years at Time 1 and Time 2, respectively).

<sup>d</sup> SD of dichotomous variables omitted.

<sup>e</sup> Reference group.

Childhood Misfortune and Handgrip Strength Among Black, White, and Hispanic Americans

**Table S3.** OLS Regression Analysis of Hand-Grip Strength in Men

| Independent Variables                | Time 1 (n=4,459)               |                    |                  |       |                  |       | Time 2 (n=3,322) |       |                  |       |                  |       |
|--------------------------------------|--------------------------------|--------------------|------------------|-------|------------------|-------|------------------|-------|------------------|-------|------------------|-------|
|                                      | Model 1                        |                    | Model 2          |       | Model 3          |       | Model 1          |       | Model 2          |       | Model 3          |       |
|                                      | b                              | SE                 | b                | SE    | b                | SE    | b                | SE    | b                | SE    | b                | SE    |
| Black                                | <i>-1.788**</i> <sup>a,b</sup> | 0.532 <sup>c</sup> | <i>-1.526*</i>   | 0.548 | -0.418           | 0.494 | 0.252            | 0.377 | 0.394            | 0.381 | 0.786            | 0.410 |
| Hispanic                             | <i>-3.981***</i>               | 0.812              | <i>-3.614***</i> | 0.788 | <i>-3.281***</i> | 0.722 | <i>-2.401***</i> | 0.476 | <i>-2.274***</i> | 0.445 | <i>-1.921***</i> | 0.470 |
| Immigrant                            | <i>-1.810**</i>                | 0.650              | <i>-1.548*</i>   | 0.642 | <i>-1.880**</i>  | 0.622 | 0.528            | 0.400 | 0.680            | 0.400 | 0.506            | 0.396 |
| Age                                  | <i>-0.524***</i>               | 0.015              | <i>-0.508***</i> | 0.017 | <i>-0.457***</i> | 0.021 | <i>-0.216***</i> | 0.017 | <i>-0.207***</i> | 0.018 | <i>-0.219***</i> | 0.020 |
| Age <sup>2</sup>                     | <i>-0.005**</i>                | 0.002              | <i>-0.005**</i>  | 0.002 | <i>-0.003*</i>   | 0.002 | <i>-0.003</i>    | 0.001 | <i>-0.003*</i>   | 0.001 | <i>-0.003</i>    | 0.001 |
| Time 1 HGS                           |                                |                    |                  |       |                  |       | <i>0.687***</i>  | 0.020 | <i>0.685***</i>  | 0.020 | <i>0.667***</i>  | 0.019 |
| Infectious Disease (=1) <sup>d</sup> |                                |                    | 0.859            | 0.771 | 0.623            | 0.741 |                  |       | -0.178           | 0.393 | -0.401           | 0.397 |
| Infectious Disease (=2+)             |                                |                    | 1.493*           | 0.648 | 1.056            | 0.616 |                  |       | 0.473            | 0.377 | 0.245            | 0.392 |
| Chronic Disease (=1) <sup>d</sup>    |                                |                    | -0.532           | 0.452 | -0.476           | 0.420 |                  |       | -0.133           | 0.227 | -0.076           | 0.225 |
| Chronic Disease (=2+)                |                                |                    | -1.618*          | 0.682 | -1.237           | 0.648 |                  |       | 0.331            | 0.439 | 0.335            | 0.432 |
| Impairment (=1) <sup>d</sup>         |                                |                    | -0.408           | 0.375 | -0.094           | 0.367 |                  |       | -0.709*          | 0.288 | -0.600*          | 0.277 |
| Impairment (=2+)                     |                                |                    | -1.266           | 1.034 | -0.395           | 0.891 |                  |       | -0.210           | 1.047 | 0.213            | 1.064 |
| SES (=1) <sup>d</sup>                |                                |                    | -0.394           | 0.441 | -0.190           | 0.436 |                  |       | -0.499           | 0.437 | -0.304           | 0.424 |
| SES (=2+)                            |                                |                    | -0.829*          | 0.369 | -0.382           | 0.325 |                  |       | -0.624*          | 0.311 | -0.279           | 0.327 |
| Parental Behavior (=1) <sup>d</sup>  |                                |                    | 0.074            | 0.357 | 0.266            | 0.324 |                  |       | -0.083           | 0.268 | 0.003            | 0.265 |
| Parental Behavior (=2+)              |                                |                    | 0.501            | 0.424 | 0.908*           | 0.396 |                  |       | 0.147            | 0.364 | 0.357            | 0.372 |
| Education                            |                                |                    |                  |       | -0.059           | 0.065 |                  |       |                  |       | 0.067            | 0.052 |
| Wealth                               |                                |                    |                  |       | 0.206***         | 0.043 |                  |       |                  |       | 0.094*           | 0.038 |
| BMI                                  |                                |                    |                  |       | 0.209***         | 0.035 |                  |       |                  |       | 0.002            | 0.032 |
| Former Smoker <sup>e</sup>           |                                |                    |                  |       | 0.341            | 0.279 |                  |       |                  |       | 0.427            | 0.267 |
| Current Smoker <sup>e</sup>          |                                |                    |                  |       | -0.445           | 0.381 |                  |       |                  |       | -0.474           | 0.368 |
| Physical Activity                    |                                |                    |                  |       | 1.317***         | 0.342 |                  |       |                  |       | 0.572*           | 0.227 |
| Depressive Symptoms                  |                                |                    |                  |       | -0.358**         | 0.121 |                  |       |                  |       | -0.174*          | 0.085 |
| Married                              |                                |                    |                  |       | 1.162**          | 0.440 |                  |       |                  |       | -0.508           | 0.355 |
| Chronic Conditions                   |                                |                    |                  |       | <i>-1.072***</i> | 0.136 |                  |       |                  |       | -0.235           | 0.128 |
| Constant                             | 38.847***                      | 0.228              | 38.336           | 0.818 | 32.063***        | 1.697 | 9.165***         | 0.833 | 9.508***         | 0.867 | 8.952***         | 1.367 |
| R <sup>2</sup>                       | 0.2831                         |                    | 0.2899           |       | 0.3379           |       | 0.6421           |       | 0.6445           |       | 0.6518           |       |

Notes <sup>a</sup> Unstandardized coefficient. <sup>b</sup> Italicized coefficient denotes significant gender differences (p<0.05) compared to Table 3. <sup>c</sup> Standard error. <sup>d</sup> Reference group for each domain is no misfortune. <sup>e</sup> Reference group is never smoker. \* p<0.05; \*\* p<0.01; \*\*\* p<0.001

Childhood Misfortune and Handgrip Strength Among Black, White, and Hispanic Americans

**Table S4.** OLS Regression Analysis of Hand-Grip Strength in Women

| Independent Variables                | Time 1 (n=6,403)           |                    |                  |       |                  |       | Time 2 (n=4,572) |       |                  |       |                  |       |
|--------------------------------------|----------------------------|--------------------|------------------|-------|------------------|-------|------------------|-------|------------------|-------|------------------|-------|
|                                      | Model 1                    |                    | Model 2          |       | Model 3          |       | Model 1          |       | Model 2          |       | Model 3          |       |
|                                      | b                          | SE                 | b                | SE    | b                | SE    | b                | SE    | b                | SE    | b                | SE    |
| Black                                | <i>0.616<sup>a,b</sup></i> | 0.309 <sup>c</sup> | <i>0.574</i>     | 0.315 | <i>1.248***</i>  | 0.277 | 0.383            | 0.212 | 0.402            | 0.211 | 0.502*           | 0.230 |
| Hispanic                             | <i>-2.655***</i>           | 0.357              | <i>-2.701***</i> | 0.361 | <i>-1.889***</i> | 0.340 | <i>-0.669*</i>   | 0.313 | <i>-0.695*</i>   | 0.312 | <i>-0.697*</i>   | 0.304 |
| Immigrant                            | -0.147                     | 0.340              | -0.155           | 0.339 | -0.151           | 0.332 | -0.177           | 0.213 | -0.154           | 0.212 | -0.184           | 0.210 |
| Age                                  | <i>-0.307***</i>           | 0.008              | <i>-0.312***</i> | 0.009 | <i>-0.279***</i> | 0.009 | <i>-0.139***</i> | 0.008 | <i>-0.140***</i> | 0.008 | <i>-0.140***</i> | 0.009 |
| Age <sup>2</sup>                     | <i>-0.002*</i>             | 0.001              | <i>-0.002*</i>   | 0.001 | <i>-0.001</i>    | 0.001 | <i>-0.001</i>    | 0.001 | <i>-0.001</i>    | 0.001 | <i>-0.001*</i>   | 0.001 |
| Time 1 HGS                           |                            |                    |                  |       |                  |       | <i>0.676***</i>  | 0.015 | <i>0.674***</i>  | 0.015 | <i>0.665***</i>  | 0.015 |
| Infectious Disease (=1) <sup>d</sup> |                            |                    | 0.171            | 0.403 | -0.092           | 0.398 |                  |       | -0.270           | 0.304 | -0.299           | 0.300 |
| Infectious Disease (=2+)             |                            |                    | 0.221            | 0.321 | -0.042           | 0.329 |                  |       | -0.119           | 0.266 | -0.137           | 0.260 |
| Chronic Disease (=1) <sup>d</sup>    |                            |                    | -0.234           | 0.231 | -0.123           | 0.218 |                  |       | -0.174           | 0.177 | -0.144           | 0.179 |
| Chronic Disease (=2+)                |                            |                    | <i>-0.566**</i>  | 0.212 | -0.269           | 0.226 |                  |       | -0.404           | 0.241 | -0.348           | 0.237 |
| Impairment (=1) <sup>d</sup>         |                            |                    | -0.259           | 0.212 | -0.193           | 0.214 |                  |       | 0.043            | 0.180 | 0.048            | 0.173 |
| Impairment (=2+)                     |                            |                    | -0.649           | 0.742 | -0.253           | 0.745 |                  |       | -0.774           | 0.474 | -0.676           | 0.485 |
| SES (=1) <sup>d</sup>                |                            |                    | 0.075            | 0.219 | 0.414            | 0.229 |                  |       | -0.081           | 0.234 | -0.020           | 0.227 |
| SES (=2+)                            |                            |                    | 0.091            | 0.194 | <i>0.634**</i>   | 0.206 |                  |       | -0.060           | 0.209 | 0.030            | 0.201 |
| Parental Behavior (=1) <sup>d</sup>  |                            |                    | -0.054           | 0.171 | -0.066           | 0.166 |                  |       | 0.105            | 0.125 | 0.107            | 0.130 |
| Parental Behavior (=2+)              |                            |                    | -0.180           | 0.230 | -0.016           | 0.245 |                  |       | 0.126            | 0.181 | 0.143            | 0.180 |
| Education                            |                            |                    |                  |       | <i>0.094**</i>   | 0.029 |                  |       |                  |       | -0.013           | 0.028 |
| Wealth                               |                            |                    |                  |       | <i>0.111***</i>  | 0.028 |                  |       |                  |       | 0.019            | 0.027 |
| BMI                                  |                            |                    |                  |       | <i>0.072***</i>  | 0.016 |                  |       |                  |       | 0.006            | 0.012 |
| Former Smoker <sup>e</sup>           |                            |                    |                  |       | 0.076            | 0.177 |                  |       |                  |       | 0.115            | 0.129 |
| Current Smoker <sup>e</sup>          |                            |                    |                  |       | 0.285            | 0.250 |                  |       |                  |       | -0.332           | 0.231 |
| Physical Activity                    |                            |                    |                  |       | <i>1.035***</i>  | 0.182 |                  |       |                  |       | <i>0.307*</i>    | 0.134 |
| Depressive Symptoms                  |                            |                    |                  |       | <i>-0.198***</i> | 0.049 |                  |       |                  |       | -0.003           | 0.030 |
| Married                              |                            |                    |                  |       | -0.009           | 0.161 |                  |       |                  |       | -0.207           | 0.119 |
| Chronic Conditions                   |                            |                    |                  |       | <i>-0.534***</i> | 0.079 |                  |       |                  |       | <i>-0.155*</i>   | 0.071 |
| Constant                             | <i>22.856***</i>           | 0.144              | <i>22.819***</i> | 0.401 | <i>19.425***</i> | 0.658 | <i>6.076***</i>  | 0.385 | <i>6.326***</i>  | 0.537 | <i>6.641***</i>  | 0.820 |
| R <sup>2</sup>                       | 0.2785                     |                    | 0.2805           |       | 0.3148           |       | 0.6418           |       | 0.6430           |       | 0.6453           |       |

Notes <sup>a</sup> Unstandardized coefficient. <sup>b</sup> Italicized coefficient denotes significant gender differences (p<0.05) compared to Table 3. <sup>c</sup> Standard error. <sup>d</sup> Reference group for each domain is no misfortune. <sup>e</sup> Reference group is never smoker. \* p<0.05; \*\* p<0.01; \*\*\* p<0.001

## Childhood Misfortune and Handgrip Strength Among Black, White, and Hispanic Americans

**Table S5:** OLS Regression Analysis of Baseline HGS in Men Including Interaction Terms (n=4,459)

| Misfortune Interacted:                  | Infectious Disease |                    | Chronic Disease |       | Impairment |       | SES    |       | Parental Behavior |       |
|-----------------------------------------|--------------------|--------------------|-----------------|-------|------------|-------|--------|-------|-------------------|-------|
| Independent Variables                   | b                  | SE                 | b               | SE    | b          | SE    | b      | SE    | b                 | SE    |
| Black                                   | 0.059 <sup>a</sup> | 1.759 <sup>b</sup> | -0.239          | 0.696 | -0.265     | 0.585 | -2.344 | 1.179 | -1.678            | 0.855 |
| Hispanic                                | -3.186             | 1.366              | -3.425          | 0.948 | -3.349     | 0.810 | -2.633 | 1.211 | -3.585            | 0.987 |
| Immigrant                               | -1.850             | 0.600              | -1.867          | 0.623 | -1.874     | 0.654 | -1.863 | 0.615 | -1.857            | 0.618 |
| Age                                     | -0.457             | 0.021              | -0.457          | 0.021 | -0.457     | 0.021 | -0.457 | 0.021 | -0.457            | 0.021 |
| Age <sup>2</sup>                        | -0.003             | 0.002              | -0.003          | 0.002 | -0.003     | 0.001 | -0.003 | 0.002 | -0.003            | 0.002 |
| <i>Childhood Misfortune<sup>c</sup></i> |                    |                    |                 |       |            |       |        |       |                   |       |
| Infectious Disease (=1)                 | 1.036              | 0.838              | 0.637           | 0.746 | 0.602      | 0.743 | 0.588  | 0.735 | 0.582             | 0.734 |
| Infectious Disease (=2+)                | 1.100              | 0.723              | 1.053           | 0.613 | 1.030      | 0.625 | 1.022  | 0.618 | 1.029             | 0.618 |
| Chronic Disease (=1)                    | -0.481             | 0.423              | -0.510          | 0.453 | -0.470     | 0.422 | -0.473 | 0.419 | -0.474            | 0.419 |
| Chronic Disease (=2+)                   | -1.188             | 0.646              | -1.109          | 0.712 | -1.244     | 0.652 | -1.234 | 0.650 | -1.238            | 0.649 |
| Impairment (=1)                         | -0.093             | 0.367              | -0.097          | 0.366 | -0.027     | 0.392 | -0.104 | 0.364 | -0.065            | 0.366 |
| Impairment (=2+)                        | -0.412             | 0.903              | -0.373          | 0.897 | -0.537     | 0.969 | -0.411 | 0.894 | -0.390            | 0.890 |
| SES (=1)                                | -0.190             | 0.436              | -0.188          | 0.436 | -0.198     | 0.434 | -0.294 | 0.449 | -0.206            | 0.434 |
| SES (=2+)                               | -0.384             | 0.330              | -0.375          | 0.324 | -0.384     | 0.325 | -0.480 | 0.350 | -0.391            | 0.326 |
| Parental Behavior (=1)                  | 0.271              | 0.323              | 0.272           | 0.323 | 0.259      | 0.325 | 0.257  | .0329 | 0.118             | 0.362 |
| Parental Behavior (=2+)                 | 0.929              | 0.396              | 0.903           | 0.399 | 0.900      | 0.392 | 0.907  | 0.399 | 0.587             | 0.436 |
| <i>Adult Covariates</i>                 |                    |                    |                 |       |            |       |        |       |                   |       |
| Education                               | -0.062             | 0.066              | -0.057          | 0.065 | -0.060     | 0.066 | -0.059 | 0.066 | -0.063            | 0.065 |
| Wealth                                  | 0.208              | 0.043              | 0.207           | 0.043 | 0.208      | 0.044 | 0.204  | 0.043 | 0.205             | 0.043 |
| BMI                                     | 0.207              | 0.035              | 0.211           | 0.035 | 0.209      | 0.035 | 0.208  | 0.035 | 0.209             | 0.035 |
| Former Smoker <sup>d</sup>              | 0.319              | 0.279              | 0.330           | 0.278 | 0.344      | 0.279 | 0.331  | 0.278 | 0.329             | 0.280 |
| Current Smoker <sup>d</sup>             | -0.461             | 0.380              | -0.441          | 0.384 | -0.450     | 0.375 | -0.439 | 0.388 | -0.477            | 0.387 |
| Physical Activity                       | 1.314              | 0.342              | 1.324           | 0.340 | 1.307      | 0.340 | 1.316  | 0.342 | 1.308             | 0.341 |
| Depressive Symptoms                     | -0.354             | 0.120              | -0.359          | 0.122 | -0.361     | 0.121 | -0.365 | 0.121 | -0.364            | 0.120 |
| Married                                 | 1.173              | 0.439              | 1.156           | 0.441 | 1.152      | 0.443 | 1.135  | 0.439 | 1.180             | 0.444 |
| Chronic Conditions                      | -1.072             | 0.135              | -1.071          | 0.136 | -1.070     | 0.135 | -1.074 | 0.136 | -1.078            | 0.138 |
| <i>Interaction Terms<sup>e</sup></i>    |                    |                    |                 |       |            |       |        |       |                   |       |
| Black*CM <sup>f</sup> (=1)              | -3.543             | 2.348              | 0.328           | 1.957 | -1.639     | 1.459 | 2.535  | 1.436 | 1.458             | 1.171 |
| Hispanic*CM (=1)                        | -0.780             | 1.601              | 0.287           | 1.508 | 0.810      | 2.353 | -0.828 | 1.588 | 0.271             | 1.191 |
| Black*CM (=2+)                          | 0.121              | 1.828              | -2.857          | 2.247 | 2.750      | 2.208 | 2.318  | 1.229 | 3.909             | 1.490 |
| Hispanic*CM (=2+)                       | 0.057              | 1.567              | 1.606           | 1.978 | -1.625     | 2.644 | -0.728 | 1.375 | 0.861             | 2.052 |
| Constant                                | 32.025             | 1.743              | 31.972          | 1.713 | 32.100     | 1.695 | 32.237 | 1.697 | 32.286            | 1.678 |
| R <sup>2</sup>                          | 0.3392             |                    | 0.3385          |       | 0.3385     |       | 0.3386 |       | 0.3390            |       |

Notes: <sup>a</sup> Unstandardized coefficient. <sup>b</sup> Standard error. <sup>c</sup> Reference group is no misfortune. <sup>d</sup> Reference group is never smoker.

<sup>e</sup> The joint significance of the four product term interactions was assessed in each of the 5 models. Due to the high number of related hypothesis tests being conducted (20 total: 5 per gender and time period), the critical value for significance was adjusted to control for the family-wise error rate using a step-down procedure (Benjamini and Liu, 1999). None of the product-term groups contributed significantly to the model (adjusted significance cutoff: 0.00256). <sup>f</sup> CM – childhood misfortune.



## Childhood Misfortune and Handgrip Strength Among Black, White, and Hispanic Americans

**Table S6:** OLS Regression Analysis of Longitudinal HGS in Men Including Interaction Terms (n=3,322)

| Misfortune Interacted:                  | Infectious Disease |                    | Chronic Disease |       | Impairment |       | SES    |       | Parental Behavior |       |
|-----------------------------------------|--------------------|--------------------|-----------------|-------|------------|-------|--------|-------|-------------------|-------|
| Independent Variables                   | b                  | SE                 | b               | SE    | b          | SE    | b      | SE    | b                 | SE    |
| Black                                   | 0.485 <sup>a</sup> | 0.784 <sup>b</sup> | 0.566           | 0.380 | 0.915      | 0.446 | 0.083  | 1.146 | 0.926             | 0.624 |
| Hispanic                                | -0.416             | 0.849              | -1.583          | 0.559 | -1.771     | 0.530 | -1.582 | 1.166 | -1.778            | 0.813 |
| Immigrant                               | 0.507              | 0.403              | 0.477           | 0.379 | 0.478      | 0.393 | 0.518  | 0.400 | 0.478             | 0.391 |
| Age                                     | -0.218             | 0.020              | -0.219          | 0.020 | -0.219     | 0.020 | -0.219 | 0.020 | -0.219            | 0.020 |
| Age <sup>2</sup>                        | -0.003             | 0.001              | -0.003          | 0.001 | -0.003     | 0.001 | -0.003 | 0.001 | -0.003            | 0.001 |
| Time 1 HGS                              | 0.667              | 0.019              | 0.668           | 0.019 | 0.667      | 0.019 | 0.667  | 0.019 | 0.668             | 0.019 |
| <i>Childhood Misfortune<sup>c</sup></i> |                    |                    |                 |       |            |       |        |       |                   |       |
| Infectious Disease (=1)                 | -0.225             | 0.505              | -0.411          | 0.396 | -0.393     | 0.401 | -0.414 | 0.393 | -0.420            | 0.401 |
| Infectious Disease (=2+)                | 0.502              | 0.480              | 0.230           | 0.389 | 0.245      | 0.393 | 0.231  | 0.387 | 0.226             | 0.391 |
| Chronic Disease (=1)                    | -0.085             | 0.225              | -0.065          | 0.249 | -0.071     | 0.226 | -0.072 | 0.226 | -0.069            | 0.226 |
| Chronic Disease (=2+)                   | 0.315              | 0.428              | 0.337           | 0.469 | 0.343      | 0.438 | 0.348  | 0.431 | 0.345             | 0.433 |
| Impairment (=1)                         | -0.607             | 0.278              | -0.597          | 0.274 | -0.560     | 0.291 | -0.593 | 0.279 | -0.608            | 0.277 |
| Impairment (=2+)                        | 0.225              | 1.067              | 0.214           | 1.065 | 0.324      | 1.114 | 0.197  | 1.063 | 0.208             | 1.067 |
| SES (=1)                                | -0.313             | 0.425              | -0.302          | 0.423 | -0.308     | 0.415 | -0.386 | 0.438 | -0.294            | 0.423 |
| SES (=2+)                               | -0.283             | 0.327              | -0.275          | 0.328 | -0.280     | 0.327 | -0.253 | 0.356 | -0.272            | 0.327 |
| Parental Behavior (=1)                  | 0.008              | 0.267              | -0.006          | 0.265 | 0.003      | 0.265 | -0.001 | 0.265 | 0.007             | 0.283 |
| Parental Behavior (=2+)                 | 0.359              | 0.374              | 0.361           | 0.375 | 0.353      | 0.374 | 0.353  | 0.374 | 0.449             | 0.404 |
| <i>Adult Covariates</i>                 |                    |                    |                 |       |            |       |        |       |                   |       |
| Education                               | 0.069              | 0.052              | 0.067           | 0.052 | 0.067      | 0.052 | 0.068  | 0.052 | 0.071             | 0.053 |
| Wealth                                  | 0.094              | 0.038              | 0.094           | 0.038 | 0.095      | 0.038 | 0.094  | 0.038 | 0.095             | 0.038 |
| BMI                                     | 0.003              | 0.032              | 0.001           | 0.032 | 0.003      | 0.032 | 0.002  | 0.032 | 0.001             | 0.032 |
| Former Smoker <sup>d</sup>              | 0.434              | 0.265              | 0.438           | 0.266 | 0.426      | 0.267 | 0.426  | 0.266 | 0.418             | 0.271 |
| Current Smoker <sup>d</sup>             | -0.470             | 0.362              | -0.479          | 0.369 | -0.479     | 0.367 | -0.479 | 0.368 | -0.483            | 0.372 |
| Physical Activity                       | 0.573              | 0.227              | 0.568           | 0.228 | 0.571      | 0.227 | 0.580  | 0.226 | 0.570             | 0.228 |
| Depressive Symptoms                     | -0.177             | 0.082              | -0.173          | 0.084 | -0.174     | 0.085 | -0.170 | 0.084 | -0.171            | 0.085 |
| Married                                 | -0.509             | 0.356              | -0.510          | 0.351 | -0.514     | 0.353 | -0.497 | 0.354 | -0.521            | 0.353 |
| Chronic Conditions                      | -0.235             | 0.129              | -0.237          | 0.128 | -0.233     | 0.129 | -0.232 | 0.128 | -0.231            | 0.129 |
| <i>Interaction Terms<sup>e</sup></i>    |                    |                    |                 |       |            |       |        |       |                   |       |
| Black*CM <sup>f</sup> (=1)              | 0.819              | 1.771              | 0.159           | 0.775 | -0.432     | 1.056 | 1.907  | 1.478 | -0.158            | 1.049 |
| Hispanic*CM (=1)                        | -1.110             | 1.269              | -0.472          | 1.196 | -0.732     | 1.194 | 0.196  | 1.519 | 0.308             | 1.128 |
| Black*CM (=2+)                          | 0.275              | 0.848              | 1.850           | 2.523 | -1.328     | 2.380 | 0.429  | 1.422 | -0.428            | 0.897 |
| Hispanic*CM (=2+)                       | -2.272             | 1.102              | -3.629          | 1.799 | -3.592     | 1.609 | -0.534 | 1.325 | -1.745            | 1.729 |
| Constant                                | 8.690              | 1.405              | 8.982           | 1.374 | 8.934      | 1.375 | 8.957  | 1.364 | 8.899             | 1.377 |
| R <sup>2</sup>                          | 0.6522             |                    | 0.6523          |       | 0.6519     |       | 0.6521 |       | 0.6520            |       |

Notes: <sup>a</sup> Unstandardized coefficient. <sup>b</sup> Standard error. <sup>c</sup> Reference group is no misfortune. <sup>d</sup> Reference group is never smoker.

<sup>e</sup> The joint significance of the four product term interactions was assessed in each of the 5 models. Due to the high number of related hypothesis tests being conducted (20 total: 5 per gender and time period), the critical value for significance was adjusted to control for the family-wise error rate using a step-down procedure (Benjamini and Liu, 1999). None of the product-term groups contributed significantly to the model (adjusted significance cutoff: 0.00256). <sup>f</sup> CM – Childhood misfortune.

## Childhood Misfortune and Handgrip Strength Among Black, White, and Hispanic Americans

**Table S7:** OLS Regression Analysis of Baseline HGS in Women Including Interaction Terms (n=6,403)

| Misfortune Interacted:                  | Infectious Disease |                    | Chronic Disease |       | Impairment |       | SES    |       | Parental Behavior |       |
|-----------------------------------------|--------------------|--------------------|-----------------|-------|------------|-------|--------|-------|-------------------|-------|
| Independent Variables                   | b                  | SE                 | b               | SE    | b          | SE    | b      | SE    | b                 | SE    |
| Black                                   | 1.635 <sup>a</sup> | 0.712 <sup>b</sup> | 1.354           | 0.322 | 1.260      | 0.294 | 0.583  | 0.824 | 1.305             | 0.468 |
| Hispanic                                | -0.383             | 0.790              | -2.175          | 0.318 | -1.956     | 0.334 | -2.109 | 0.836 | -2.586            | 0.421 |
| Immigrant                               | -0.138             | 0.334              | -0.158          | 0.334 | -0.147     | 0.332 | -0.135 | 0.336 | -0.161            | 0.325 |
| Age                                     | -0.278             | 0.009              | -0.279          | 0.009 | -0.279     | 0.009 | -0.278 | 0.009 | -0.279            | 0.009 |
| Age <sup>2</sup>                        | -0.001             | 0.001              | -0.001          | 0.001 | -0.001     | 0.001 | -0.001 | 0.001 | -0.001            | 0.001 |
| <i>Childhood Misfortune<sup>c</sup></i> |                    |                    |                 |       |            |       |        |       |                   |       |
| Infectious Disease (=1)                 | 0.343              | 0.491              | -0.093          | 0.398 | -0.082     | 0.399 | -0.078 | 0.399 | -0.110            | 0.399 |
| Infectious Disease (=2+)                | 0.300              | 0.415              | -0.058          | 0.330 | -0.033     | 0.329 | -0.034 | 0.331 | -0.057            | 0.330 |
| Chronic Disease (=1)                    | -0.126             | 0.218              | -0.090          | 0.217 | -0.127     | 0.219 | -0.128 | 0.219 | -0.125            | 0.218 |
| Chronic Disease (=2+)                   | -0.267             | 0.226              | -0.377          | 0.254 | -0.251     | 0.227 | -0.283 | 0.227 | -0.269            | 0.228 |
| Impairment (=1)                         | -0.196             | 0.213              | -0.182          | 0.216 | -0.259     | 0.229 | -0.185 | 0.215 | -0.196            | 0.215 |
| Impairment (=2+)                        | -0.231             | 0.744              | -0.252          | 0.741 | 0.030      | 0.835 | -0.240 | 0.747 | -0.264            | 0.747 |
| SES (=1)                                | 0.418              | 0.228              | 0.404           | 0.228 | 0.419      | 0.230 | 0.408  | 0.257 | 0.418             | 0.228 |
| SES (=2+)                               | 0.633              | 0.207              | 0.631           | 0.207 | 0.637      | 0.209 | 0.535  | 0.219 | 0.639             | 0.207 |
| Parental Behavior (=1)                  | -0.064             | 0.167              | -0.064          | 0.167 | -0.066     | 0.166 | -0.067 | 0.166 | -0.160            | 0.179 |
| Parental Behavior (=2+)                 | -0.009             | 0.245              | -0.016          | 0.248 | -0.014     | 0.245 | -0.017 | 0.243 | -0.014            | 0.257 |
| <i>Adult Covariates</i>                 |                    |                    |                 |       |            |       |        |       |                   |       |
| Education                               | 0.096              | 0.029              | 0.090           | 0.029 | 0.093      | 0.029 | 0.094  | 0.030 | 0.098             | 0.029 |
| Wealth                                  | 0.111              | 0.028              | 0.113           | 0.028 | 0.112      | 0.028 | 0.110  | 0.028 | 0.110             | 0.028 |
| BMI                                     | 0.071              | 0.016              | 0.072           | 0.015 | 0.072      | 0.015 | 0.072  | 0.015 | 0.073             | 0.015 |
| Former Smoker <sup>d</sup>              | 0.079              | 0.177              | 0.074           | 0.176 | 0.079      | 0.177 | 0.072  | 0.175 | 0.070             | 0.174 |
| Current Smoker <sup>d</sup>             | 0.286              | 0.251              | 0.284           | 0.249 | 0.288      | 0.251 | 0.288  | 0.248 | 0.289             | 0.249 |
| Physical Activity                       | 1.043              | 0.184              | 1.026           | 0.181 | 1.034      | 0.182 | 1.032  | 0.183 | 1.039             | 0.182 |
| Depressive Symptoms                     | -0.199             | 0.049              | -0.200          | 0.049 | -0.198     | 0.050 | -0.199 | 0.049 | -0.197            | 0.049 |
| Married                                 | -0.009             | 0.162              | -0.000          | 0.162 | -0.016     | 0.161 | -0.014 | 0.161 | -0.006            | 0.161 |
| Chronic Conditions                      | -0.535             | 0.079              | 0.533           | 0.079 | -0.538     | 0.079 | -0.532 | 0.079 | -0.538            | 0.079 |
| <i>Interaction Terms<sup>e</sup></i>    |                    |                    |                 |       |            |       |        |       |                   |       |
| Black*CM <sup>f</sup> (=1)              | -0.693             | 0.985              | -0.678          | 0.720 | 0.429      | 0.648 | 0.124  | 0.866 | -0.019            | 0.484 |
| Hispanic*CM (=1)                        | -2.031             | 0.651              | 0.186           | 0.891 | 0.701      | 0.731 | 0.319  | 1.023 | 1.394             | 0.548 |
| Black*CM (=2+)                          | -0.333             | 0.825              | 0.015           | 0.633 | -2.479     | 2.243 | 1.078  | 0.891 | -0.581            | 1.039 |
| Hispanic*CM (=2+)                       | -1.654             | 0.651              | 1.863           | 0.820 | 0.365      | 1.784 | 0.240  | 0.853 | 0.207             | 0.976 |
| Constant                                | 19.064             | 0.697              | 19.493          | 0.657 | 19.437     | 0.657 | 19.469 | 0.665 | 19.417            | 0.658 |
| R <sup>2</sup>                          | 0.3155             |                    | 0.3156          |       | 0.3153     |       | 0.3154 |       | 0.3156            |       |

Notes: <sup>a</sup> Unstandardized coefficient. <sup>b</sup> Standard error. <sup>c</sup> Reference group is no misfortune. <sup>d</sup> Reference group is never smoker.

<sup>e</sup> The joint significance of the four product term interactions was assessed in each of the 5 models. Due to the high number of related hypothesis tests being conducted (20 total: 5 per gender and time period), the critical value for significance was adjusted to control for the family-wise error rate using a step-down procedure (Benjamini and Liu, 1999). None of the product-term groups contributed significantly to the model (adjusted significance cutoff: 0.00256). <sup>f</sup> CM - Childhood misfortune.

## Childhood Misfortune and Handgrip Strength Among Black, White, and Hispanic Americans

**Table S8:** OLS Regression Analysis of Longitudinal HGS in Women Including Interaction Terms (n=4,572)

| Misfortune Interacted:                  | Infectious Disease |                    | Chronic Disease |       | Impairment |       | SES    |       | Parental Behavior |       |
|-----------------------------------------|--------------------|--------------------|-----------------|-------|------------|-------|--------|-------|-------------------|-------|
| Independent Variables                   | b                  | SE                 | b               | SE    | b          | SE    | b      | SE    | b                 | SE    |
| Black                                   | 1.121 <sup>a</sup> | 0.671 <sup>b</sup> | 0.437           | 0.245 | 0.527      | 0.233 | 0.489  | 0.581 | 0.446             | 0.343 |
| Hispanic                                | -0.779             | 0.814              | -0.841          | 0.325 | -0.730     | 0.332 | -0.129 | 0.821 | -1.044            | 0.480 |
| Immigrant                               | -0.177             | 0.207              | -0.179          | 0.211 | -0.177     | 0.214 | -0.196 | 0.212 | -0.154            | 0.218 |
| Age                                     | -0.140             | 0.009              | -0.140          | 0.009 | -0.140     | 0.009 | -0.141 | 0.009 | -0.140            | 0.009 |
| Age <sup>2</sup>                        | -0.001             | 0.001              | -0.001          | 0.001 | -0.001     | 0.001 | -0.001 | 0.001 | -0.001            | 0.001 |
| Time 1 HGS                              | 0.665              | 0.015              | 0.666           | 0.015 | 0.665      | 0.015 | 0.665  | 0.015 | 0.665             | 0.015 |
| <i>Childhood Misfortune<sup>c</sup></i> |                    |                    |                 |       |            |       |        |       |                   |       |
| Infectious Disease (=1)                 | -0.163             | 0.351              | -0.287          | 0.303 | -0.294     | 0.302 | -0.310 | 0.297 | -0.323            | 0.301 |
| Infectious Disease (=2+)                | -0.072             | 0.298              | -0.132          | 0.261 | -0.129     | 0.263 | -0.147 | 0.259 | -0.164            | 0.259 |
| Chronic Disease (=1)                    | -0.145             | 0.180              | -0.220          | 0.198 | -0.144     | 0.178 | -0.143 | 0.179 | -0.142            | 0.179 |
| Chronic Disease (=2+)                   | -0.348             | 0.236              | -0.327          | 0.263 | -0.333     | 0.236 | -0.348 | 0.237 | -0.344            | 0.236 |
| Impairment (=1)                         | 0.049              | 0.174              | 0.051           | 0.173 | 0.026      | 0.178 | 0.049  | 0.173 | 0.054             | 0.174 |
| Impairment (=2+)                        | -0.669             | 0.484              | -0.643          | 0.485 | -0.521     | 0.503 | -0.678 | 0.488 | -0.674            | 0.485 |
| SES (=1)                                | -0.021             | 0.228              | -0.024          | 0.228 | -0.020     | 0.226 | -0.027 | 0.243 | -0.022            | 0.226 |
| SES (=2+)                               | 0.023              | 0.202              | 0.028           | 0.200 | 0.036      | 0.200 | 0.051  | 0.218 | 0.028             | 0.200 |
| Parental Behavior (=1)                  | 0.104              | 0.130              | 0.104           | 0.129 | 0.101      | 0.131 | 0.109  | 0.130 | 0.080             | 0.144 |
| Parental Behavior (=2+)                 | 0.143              | 0.180              | 0.141           | 0.179 | 0.136      | 0.179 | 0.143  | 0.181 | 0.064             | 0.196 |
| <i>Adult Covariates</i>                 |                    |                    |                 |       |            |       |        |       |                   |       |
| Education                               | -0.014             | 0.028              | -0.012          | 0.028 | -0.013     | 0.028 | -0.014 | 0.028 | -0.013            | 0.028 |
| Wealth                                  | 0.018              | 0.027              | 0.018           | 0.027 | 0.019      | 0.027 | 0.019  | 0.027 | 0.018             | 0.027 |
| BMI                                     | 0.006              | 0.012              | 0.006           | 0.012 | 0.007      | 0.012 | 0.006  | 0.012 | 0.007             | 0.012 |
| Former Smoker <sup>d</sup>              | 0.111              | 0.128              | 0.112           | 0.129 | 0.121      | 0.130 | 0.117  | 0.129 | 0.115             | 0.128 |
| Current Smoker <sup>d</sup>             | -0.338             | 0.231              | -0.332          | 0.229 | -0.326     | 0.230 | -0.332 | 0.232 | -0.332            | 0.231 |
| Physical Activity                       | 0.308              | 0.133              | 0.308           | 0.134 | 0.308      | 0.134 | 0.308  | 0.134 | 0.310             | 0.132 |
| Depressive Symptoms                     | -0.003             | 0.030              | -0.004          | 0.030 | -0.003     | 0.029 | -0.004 | 0.030 | -0.006            | 0.030 |
| Married                                 | -0.206             | 0.118              | -0.209          | 0.119 | -0.208     | 0.119 | -0.207 | 0.119 | -0.199            | 0.120 |
| Chronic Conditions                      | -0.156             | 0.071              | -0.155          | 0.070 | -0.158     | 0.071 | -0.156 | 0.071 | -0.153            | 0.070 |
| <i>Interaction Terms<sup>e</sup></i>    |                    |                    |                 |       |            |       |        |       |                   |       |
| Black*CM <sup>f</sup> (=1)              | -0.768             | 0.825              | 0.694           | 0.731 | 0.181      | 0.778 | 0.107  | 0.707 | -0.027            | 0.453 |
| Hispanic*CM (=1)                        | -0.456             | 0.901              | 0.941           | 0.471 | 0.212      | 0.655 | -0.303 | 1.179 | 0.375             | 0.483 |
| Black*CM (=2+)                          | -0.658             | 0.720              | -0.384          | 0.750 | -1.894     | 1.753 | -0.020 | 0.678 | 0.449             | 0.725 |
| Hispanic*CM (=2+)                       | 0.272              | 0.860              | -0.065          | 0.843 | 2.104      | 0.688 | -0.689 | 0.929 | 1.294             | 1.066 |
| Constant                                | 6.602              | 0.833              | 6.639           | 0.813 | 6.627      | 0.827 | 6.648  | 0.817 | 6.682             | 0.820 |
| R <sup>2</sup>                          | 0.6455             |                    | 0.6457          |       | 0.6456     |       | 0.6454 |       | 0.6456            |       |

Notes: <sup>a</sup> Unstandardized coefficient. <sup>b</sup> Standard error. <sup>c</sup> Reference group is no misfortune. <sup>d</sup> Reference group is never smoker.

<sup>e</sup> The joint significance of the four product term interactions was assessed in each of the 5 models. Due to the high number of related hypothesis tests being conducted (20 total: 5 per gender and time period), the critical value for significance was adjusted to control for the family-wise error rate using a step-down procedure (Benjamini and Liu, 1999). None of the product-term groups contributed significantly to the model (adjusted significance cutoff: 0.00256). <sup>f</sup> CM – Childhood misfortune.

**References:**

Benjamini, Y., & Liu, W. (1999). A step-down multiple hypotheses testing procedure that controls the false discovery rate under independence. *Journal of Statistical Planning and Inference*, 82(1), 163–170.

Heckman, J. J. (1976). The common structure of statistical models of truncation, sample selection and limited dependent variables and a simple estimator for such models. In *Annals of Economic and Social Measurement*, 5(4), 475-492.
